# Supplementary material for: One-step electrochemical fabrication of nanoporous gold wire arrays from ionic liquid
Source: Royal Society of Chemistry journal article supplement (doi:10.1039/c3cc46061d), 2013-10-25
Supplement: c3cc46061d.pdf [file c3cc46061d.pdf]

## Electronic supplementary information

### One-Step Electrochemical Fabrication of Nanoporous Gold Wire Arrays from Ionic Liquid

#### Experimental details

All experiments were performed in a nitrogen-filled glove box. The deposition solutions were prepared by the dissolution of  $\text{HAuCl}_4 \cdot 3\text{H}_2\text{O}$  (Alfa Aesar, 99.99%) at various molar ratios into 40-60 mol%  $\text{ZnCl}_2$ -EMIC IL at 90 °C. All electrochemical experiments were carried out in a three-electrode cell using an EG&G model 263 potentiostat/gavanostat controlled with EG&G model 270 software. An Au wire was used as the counter electrode and a Zn wire (99.95%) immersed in 50-50 mol%  $\text{ZnCl}_2$ -EMIC solution contained in a fritted glass tube was used as the reference electrode. A W wire (area =  $0.112 \text{ cm}^2$ ) was used as the working electrode for cyclic voltammetry and as the substrate for electrodeposition. A screen-printed electrode (area =  $0.19 \text{ cm}^2$ ) was used as the substrate for electrocatalysis. The metal substrates were cleaned with 2 M  $\text{HNO}_3$  and distilled water, and dried in a vacuum before use. The surface morphologies of the Au nanowires and nanoporous wires were observed by field-emission scanning electron microscopy (FE-SEM, XL40-FEG), environmental scanning electron microscopy (ESEM, FEI Quanta 400 F), and transmission electron microscopy (TEM, JEOL JEM-2100F CS STEM). The structures of the Au nanowires and nanoporous wires were analyzed by X-ray diffraction (XRD, Shimadzu, XRD-7000).

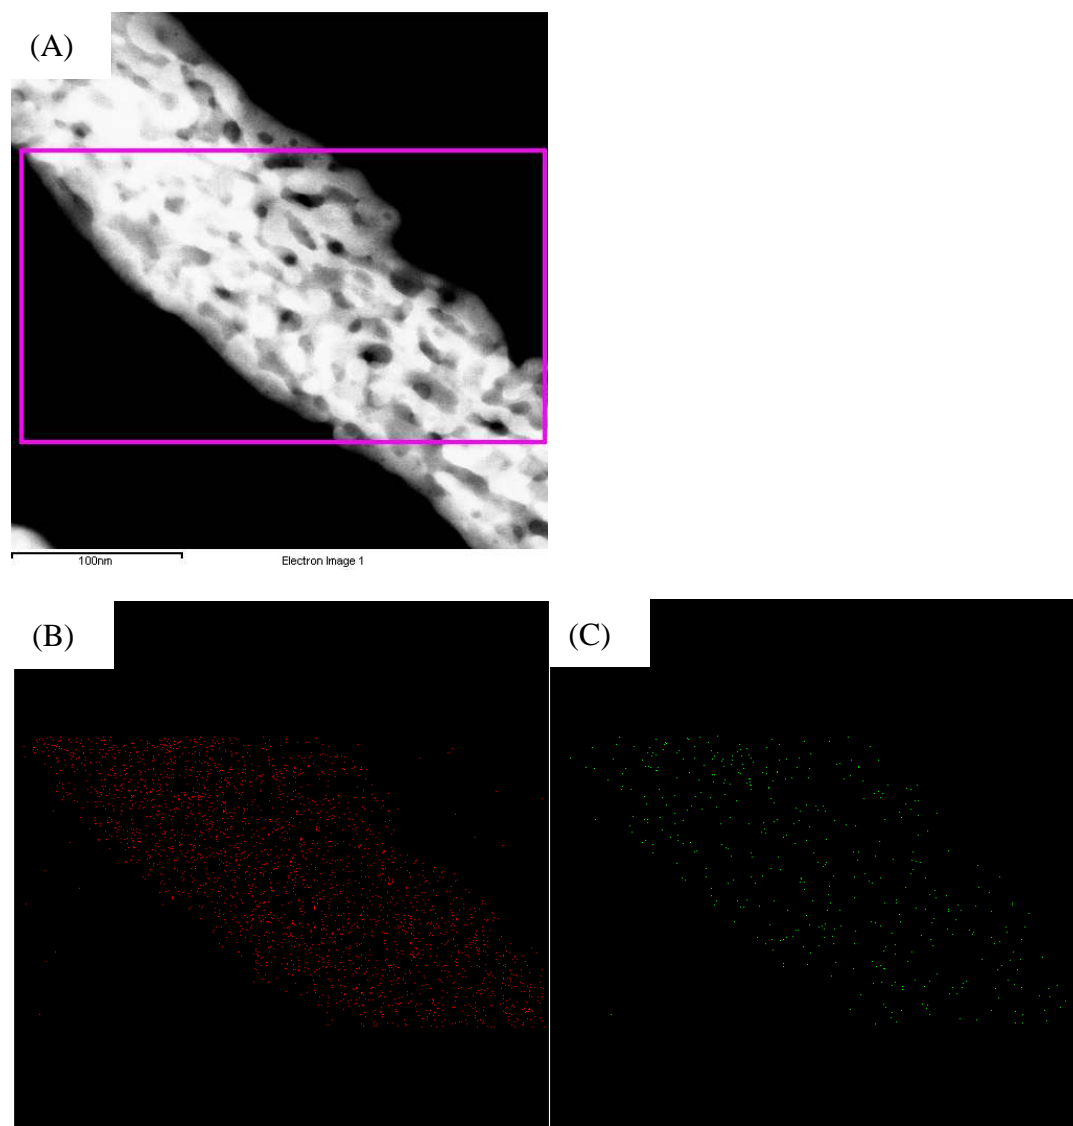

Fig. S1. A) HAADF image of the nanoporous wires; TEM element mappings of the area selected in (A), (B) Au-element, (C) Zn-element.
